# Supplementary material
Source: MDPI journal article supplement (https://www.mdpi.com/2073-4344/14/2/152)
Supplement: s1 [file s1]

# Supplementary materials for the paper

## Platinum-Modified Mixed Metal Oxide Electrodes for Efficient Chloralkaline-Based Energy Storage

Jamyllle Y.C. Ribeiro <sup>1,2,3</sup>, Gessica O. S. Santos <sup>3,4</sup>, Aline R. Dória <sup>1,4</sup>, Iñaki Requena <sup>3</sup>, Marcos R. V. Lanza <sup>4</sup>, Katlin I. B. Eguiluz <sup>1,2</sup>, Giancarlo R. Salazar-Banda <sup>1,2</sup>, Justo Lobato <sup>3,\*</sup> and Manuel A. Rodrigo <sup>3,\*</sup>

<sup>1</sup> Electrochemistry and Nanotechnology Laboratory, Institute of Technology and Research (ITP), Aracaju, SE 49032-490, Brazil; jamyllrib@gmail.com (J.Y.C.R.); alinerdoria@gmail.com (A.R.D.); katlinbarrios@gmail.com (K.I.B.E.); gianrsb@gmail.com (G.R.S.-B.)

<sup>2</sup> Graduate Program in Processes Engineering (PEP), Tiradentes University, Aracaju, SE 49032-490, Brazil

<sup>3</sup> Chemical Engineering Department, Faculty of Chemical Sciences and Technologies, Universidad Castilla-La Mancha, 13004 Ciudad Real, Spain; gessicasantiago@usp.br (G.O.S.S.); inaki.requena@uclm.es (I.R.)

<sup>4</sup> São Carlos Institute of Chemistry, University of São Paulo, São Carlos, S.P. 13566-590, Brazil; marcoslanza@usp.br

\* Correspondence: justo.lobato@uclm.es (J.L.); manuel.rodrigo@uclm.es (M.A.R.)

**Table S1.** Main chemicals used in this work.

| Reagent                          | Chemical formula                                    | Supplier       | Purity (%) |
|----------------------------------|-----------------------------------------------------|----------------|------------|
| Hydrochloric acid                | HCl                                                 | Neon®          | 38.0       |
| Sulfuric acid                    | H <sub>2</sub> SO <sub>4</sub>                      | Scharlau®      | 97.0       |
| Ruthenium (III) chloride hydrate | RuCl <sub>3</sub> ·xH <sub>2</sub> O                | Sigma-Aldrich® | 99.5       |
| Antimony (III) chloride          | SbCl <sub>3</sub>                                   | Sigma-Aldrich® | 99.0       |
| Hexachloroplatinic acid          | H <sub>2</sub> PtCl <sub>6</sub> ·6H <sub>2</sub> O | Sigma-Aldrich® | 37.5       |
| Oxalic acid                      | C <sub>2</sub> H <sub>2</sub> O <sub>4</sub>        | Sigma-Aldrich® | 99.5       |
| Isopropanol                      | C <sub>3</sub> H <sub>8</sub> O                     | Sigma-Aldrich® | 99.8       |
| Sodium chloride                  | NaCl                                                | Panreac®       | 99.5       |

**Table S2.** Determination of the nominal and experimental proportion of metals in the oxide films.

| Electrodes                                                                                                 | Nominal composition (mol%) |      |    | Experimental composition (mol%) (SEM-EDX) |      |      | The atomic ratio of elements (at.%-ICP) |      |      |
|------------------------------------------------------------------------------------------------------------|----------------------------|------|----|-------------------------------------------|------|------|-----------------------------------------|------|------|
|                                                                                                            | Ru                         | Sb   | Pt | Ru                                        | Sb   | Pt   | Ru                                      | Sb   | Pt   |
| Ti/(RuO <sub>2</sub> ) <sub>70</sub> -(Sb <sub>2</sub> O <sub>4</sub> ) <sub>30</sub>                      | 70                         | 30   | -  | 75.5                                      | 24.5 | -    | 69.4                                    | 30.6 | -    |
| Ti/(RuO <sub>2</sub> ) <sub>66.5</sub> -(Sb <sub>2</sub> O <sub>4</sub> ) <sub>28.5</sub> -Pt <sub>5</sub> | 66.5                       | 28.5 | 5  | 67.0                                      | 27.5 | 5.5  | 84.9                                    | 12.6 | 2.5  |
| Ti/(RuO <sub>2</sub> ) <sub>63</sub> -(Sb <sub>2</sub> O <sub>4</sub> ) <sub>27</sub> -Pt <sub>10</sub>    | 63                         | 27   | 10 | 66.2                                      | 23.6 | 10.2 | 60.8                                    | 22.7 | 16.5 |
